# Supplementary material for: Spatial variations in crop growing seasons pivotal to reproduce global fluctuations in maize and wheat yields
Source: PubMed Central journal article supplement — Sci Adv. 2018 Nov 21;4(11):eaat4517. doi: 10.1126/sciadv.aat4517 (PMC6248948; doi:10.1126/sciadv.aat4517), 2018-11-21
Supplement: aat4517_SM.pdf [file aat4517_SM.pdf]

## Supplementary Materials for

### **Spatial variations in crop growing seasons pivotal to reproduce global fluctuations in maize and wheat yields**

Jonas Jägermeyr\* and Katja Frieler

\*Corresponding author. Email: jaegermeyr@uchicago.edu

Published 21 November 2018, *Sci. Adv.* **4**, eaat4517 (2018)

DOI: 10.1126/sciadv.aat4517

#### **This PDF file includes:**

- Fig. S1. Root mean square error of standardized country-level yield anomalies for maize and wheat.
- Fig. S2. Observed and simulated historical maize and wheat yield anomaly time series.
- Fig. S3. Sensitivity of mean explained variance to number of countries considered.
- Fig. S4. Evaluation of available growing season inputs.
- Fig. S5. Best-performing crop calendar per country.
- Fig. S6. Evaluation of different climate inputs.
- Fig. S7. Influences of heat waves and droughts on rainfed and irrigated yields.
- Fig. S8. Observed and simulated influences of the 2003 European heat wave on maize yields.
- Fig. S9. Effects of growing season adjustment on wheat rainfall deficit.
- Table S1. Explained variances and RMSE of maize country-level yield anomalies.
- Table S2. Explained variances and RMSE of wheat country-level yield anomalies.
- Table S3. List of extreme events considered in this study.

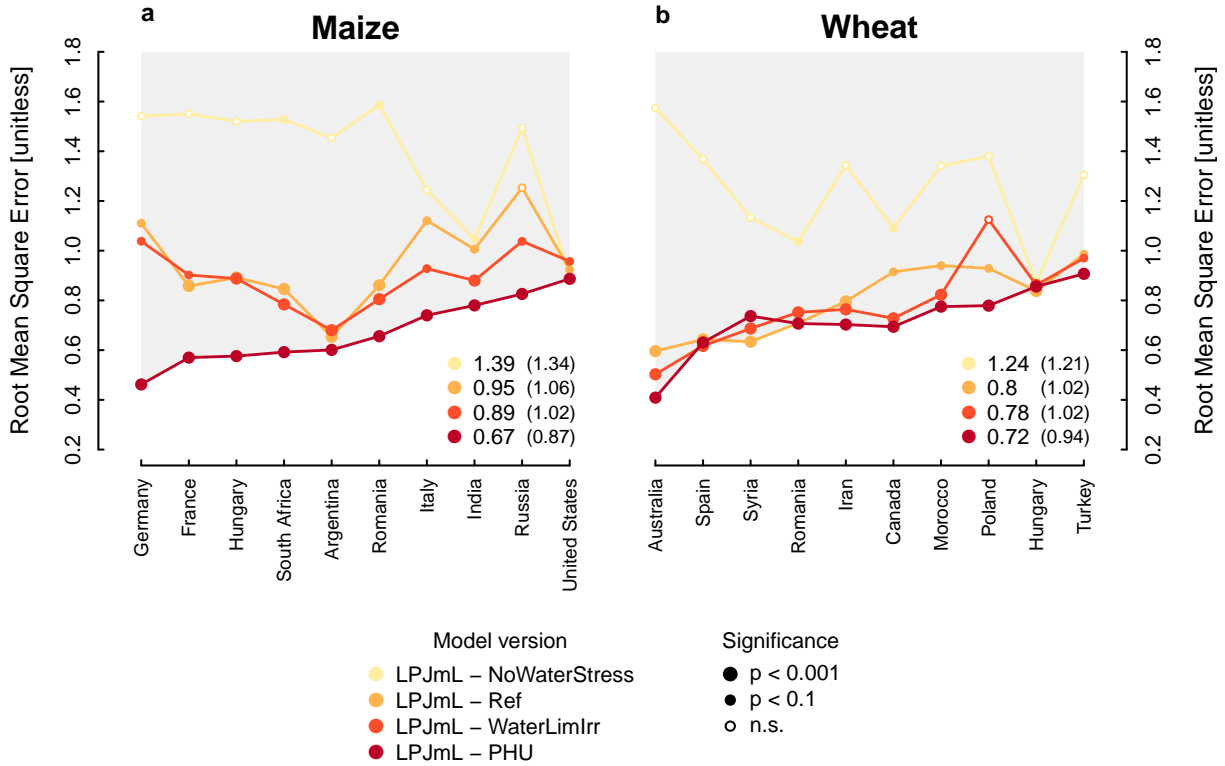

**Fig. S1. Root mean square error of standardized country-level yield anomalies for maize (a) and wheat (b).** RMSE values between four different LPJmL simulations (see Table 1) and observed FAO yield anomaly time series (1980 – 2010) are highlighted for the 10 main producer countries showing highest weather sensitivity (see Table S1, S2 for all main producer countries). Statistical significance of the explained variance is indicated through chart symbols (large dots if  $p$ -value  $< 0.001$ ; small dots if  $p$ -value  $< 0.1$ ; circle if not significant, i.e.  $p$ -value  $\geq 0.1$ ). Mean RMSE values across displayed most weather-sensitive main producers (and across all main producers in brackets) are shown in the bottom-right corner.

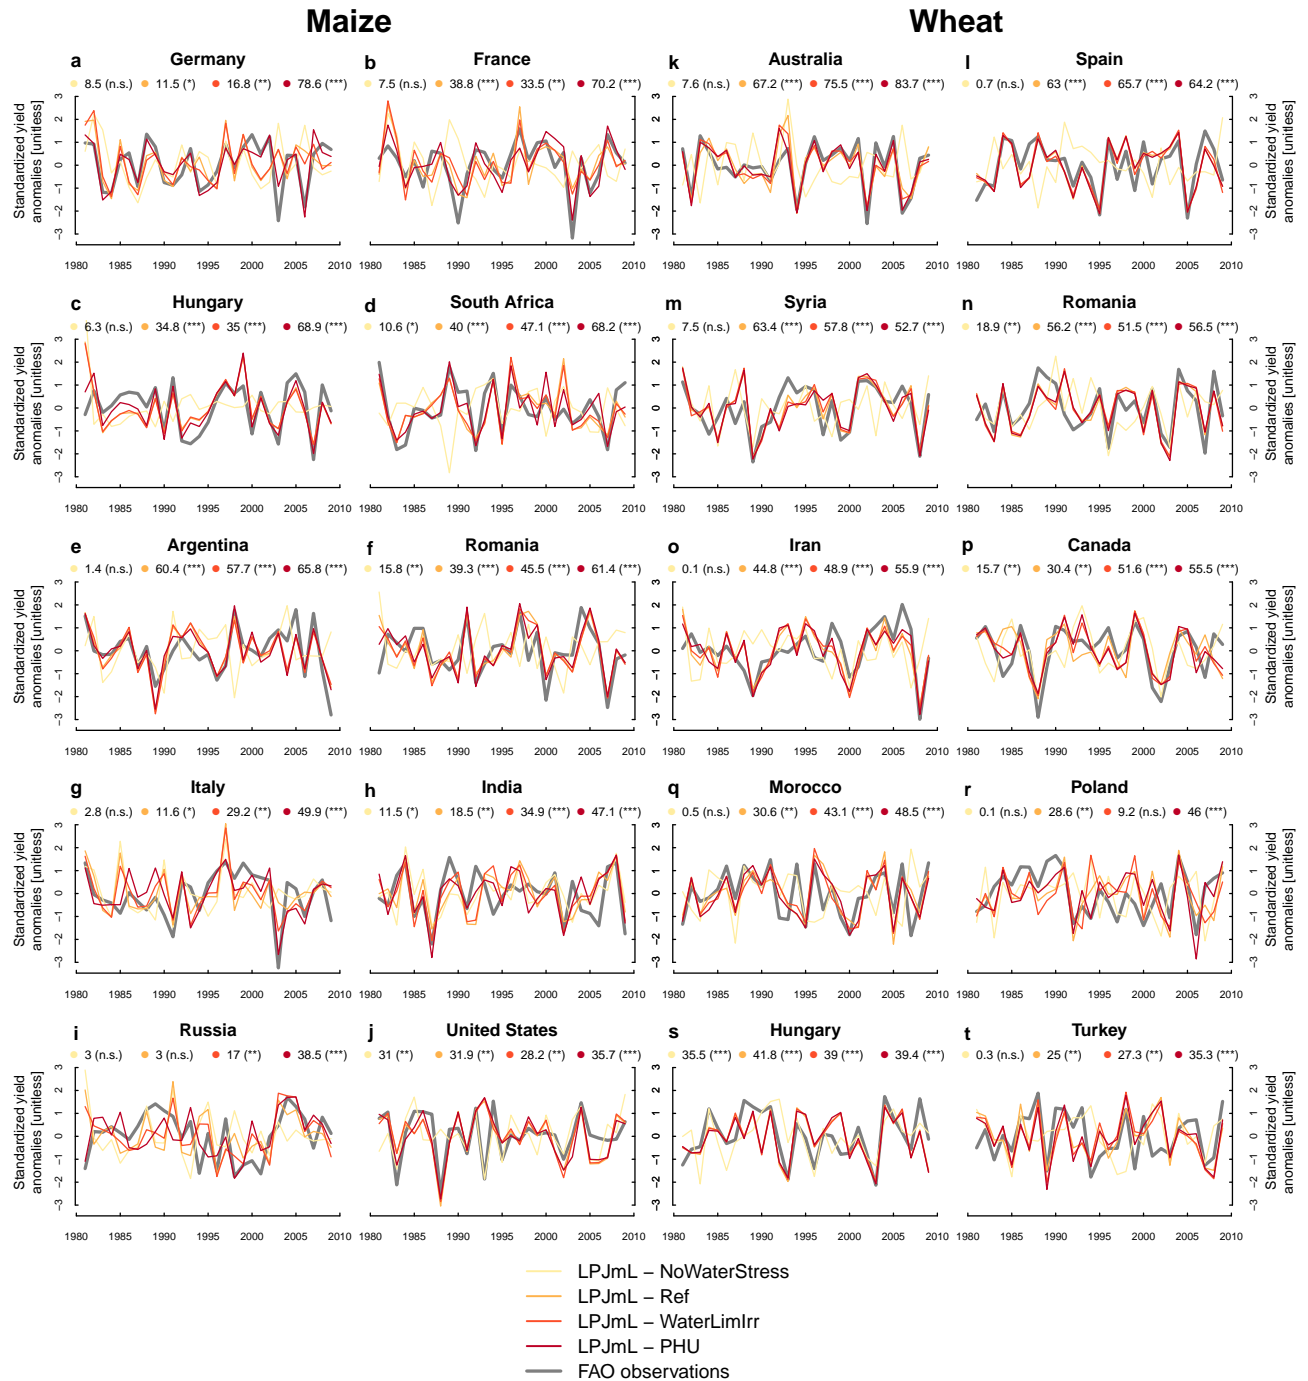

**Fig. S2. Observed and simulated historical maize and wheat yield anomaly time series.**

Simulated (yellow – red) and observed (gray) standardized yield anomalies from 1980 – 2010 for maize (left column) and wheat (right column) are shown for the most weather-sensitive main producers in Figure 1. Colored dots in each panel indicate the  $R^2$  value between FAO observations and the respective LPJmL simulation with statistical significance in brackets (“\*\*\*” if  $p < 0.001$ ; “\*\*” if  $p < 0.05$ ; “\*”  $p < 0.1$ ; “n.s.” if  $p \geq 0.1$ ).

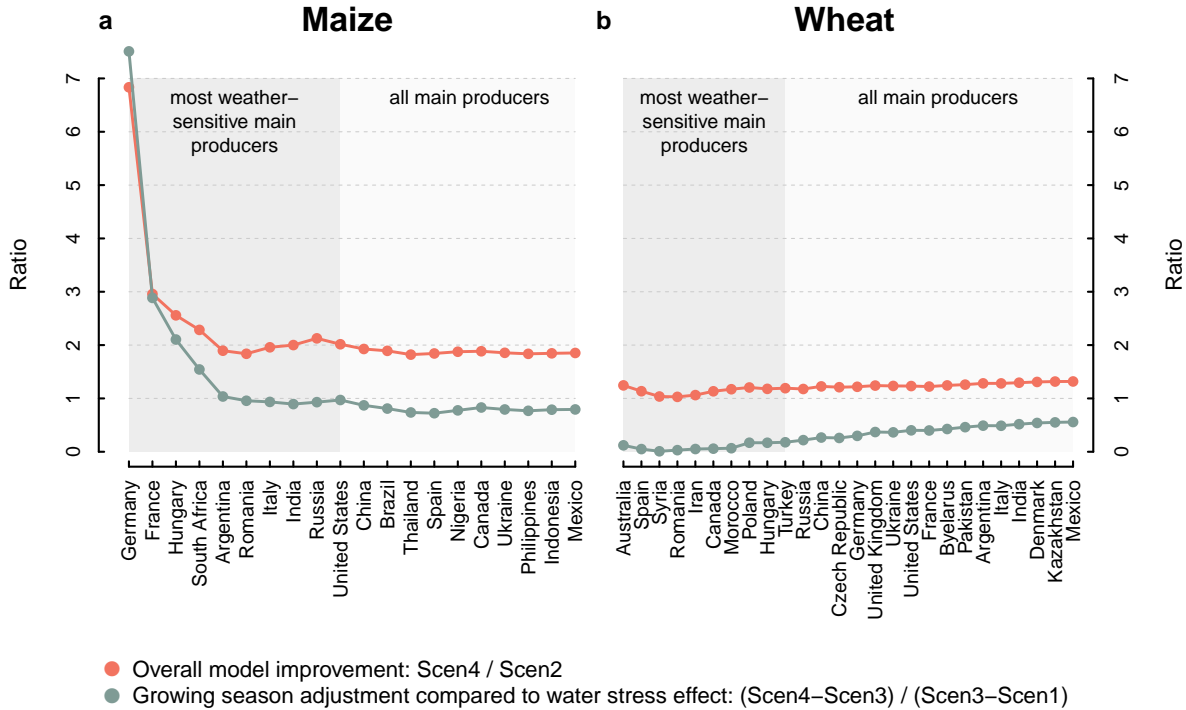

**Fig. S3. Sensitivity of mean explained variance to number of countries considered.** Scen1 (LPJmL–NoWaterStress), Scen2 (LPJmL–Ref), Scen3 (LPJmL–WaterLimIrr), and Scen4 (LPJmL–PHU) represent  $R^2$  values between observed and simulated maize (a) and wheat (b) yield anomalies achieved by the respective model as in Figure 1, but here shown as cumulative ratios across an increasing number of countries, starting from the single most weather-sensitive country to all main producers. Red lines illustrates the overall model improvement realized in this study (i.e. LPJmL–Ref to LPJmL–PHU), shown as the ratio of Scen4 and Scen2. This underpins the statement in the main text that the explained variance in maize simulations roughly doubles across all main producer countries. The green line illustrates the increase in explained variance due to the growing season adjustment (i.e. LPJmL–WaterLimIrr to LPJmL–PHU) compared to the increase due to considering water stress (i.e. LPJmL–NoWaterStress to LPJmL–WaterLimIrr), shown as  $(Scen4 - Scen3)/(Scen3 - Scen1)$ . This supports the statement in the main text that the growing season adjustment improves the explained variance for maize to about the same degree as the representation of water stress. For wheat, panel b highlights that the growing season adjustment becomes more important toward the lower end of weather sensitivity.

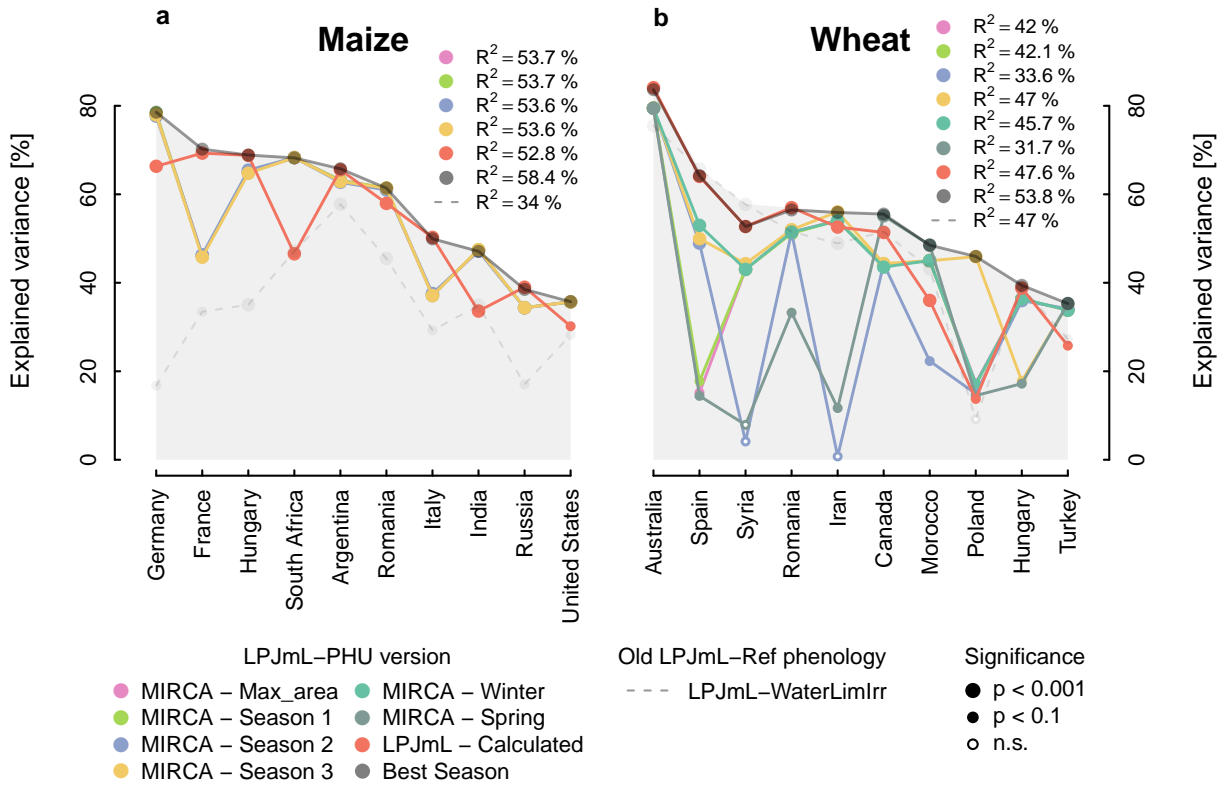

**Fig. S4. Evaluation of available growing season inputs.** This figure shows the explained variance of country-level yield anomalies simulated with the LPJmL-PHU model, similar to Figure 1, but differentiating available growing season inputs, for maize (a) and wheat (b), respectively. "MIRCA maxarea" refers to the MIRCA growing season with the largest cropland area associated, "MIRCA winter" and "MIRCA spring" refer to winter or spring crops (only wheat), "MIRCA season 1 – 3" refer to the first, second, or third season listed. "LPJmL – Calculated" refers to growing seasons calculated by the LPJmL-Ref model used as input in LPJmL-PHU, and the "Best season" refers to the per-country selection of the season that leads to the highest correlation between simulated and observed yield anomalies across the seven previous options (the default setup for LPJmL-PHU in this paper as described in Table 1). The dashed line represents LPJmL-WaterLimIrr (LPJmL-Ref phenology but water constraints as in LPJmL-PHU) as shown in Figure 1. The difference between the red and the dashed line thus illustrates the model improvement solely due to spatially-resolved PHUs (i.e. without contributions from MIRCA2000 crop calendar dates).  $R^2$  values in the top-right corner indicate the mean value across displayed countries.

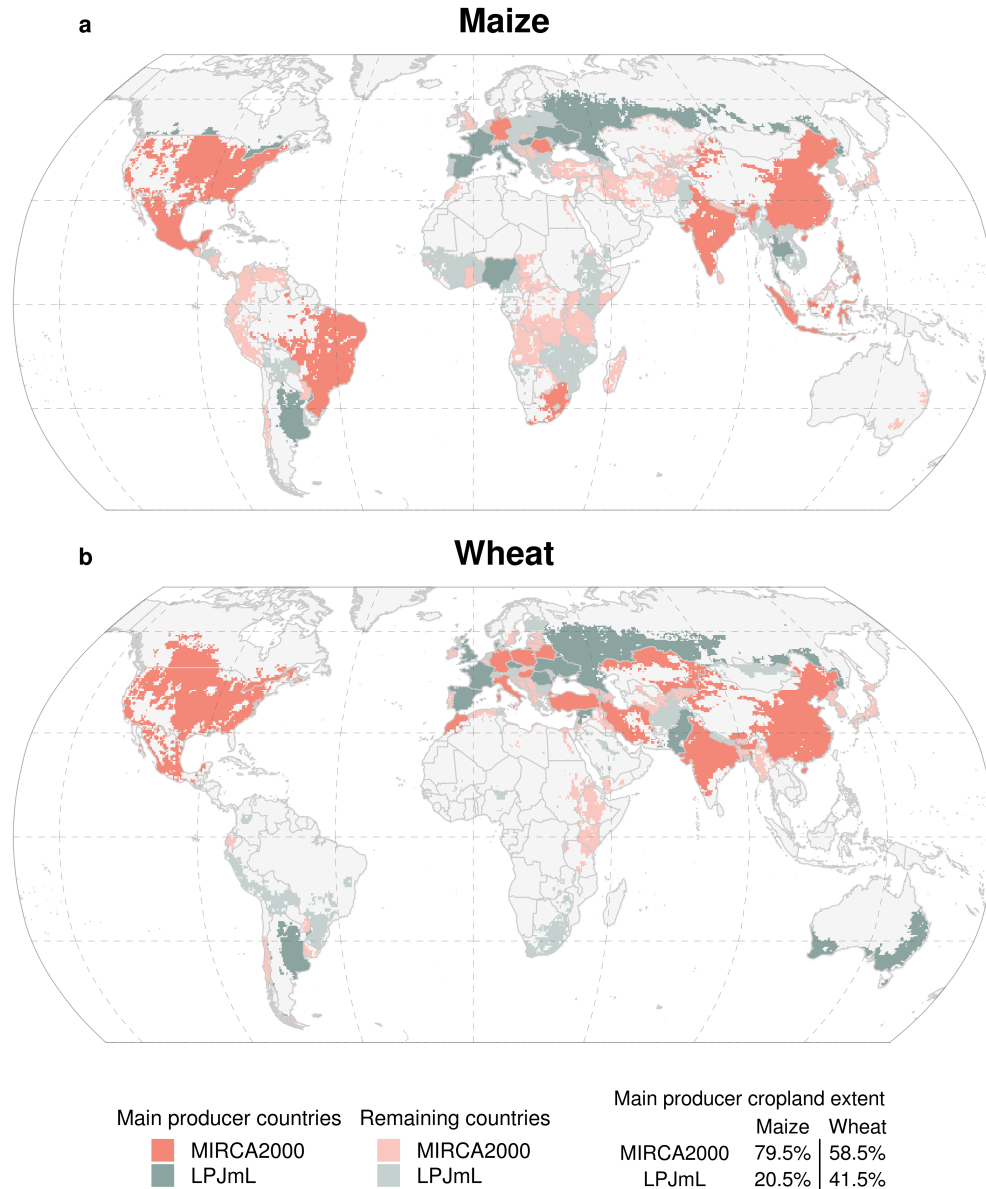

**Fig. S5. Best-performing crop calendar per country.** For maize (a) and wheat (b), countries are associated with the crop calendar – i.e. MIRCA2000 or LPJmL-calculated – that leads to the highest correlation between simulated and observed yield anomalies when used as input in the LPJmL–PHU model (see Material and Methods). Main producer countries, that collectively provide  $\geq 90\%$  of the respective global production, are highlighted through more saturated hues. Grid cells in which the respective crop is not simulated are masked. The legend table differentiates for both crops the main producer countries’ cropland extent with respect to the best-performing crop calendar. Note that the MIRCA2000 dataset is compiled at subnational resolution in countries such as the USA, India, China, and Brazil, and provides national-level information in Russia, Spain, France, Ukraine, Pakistan, and Argentina among others (27).

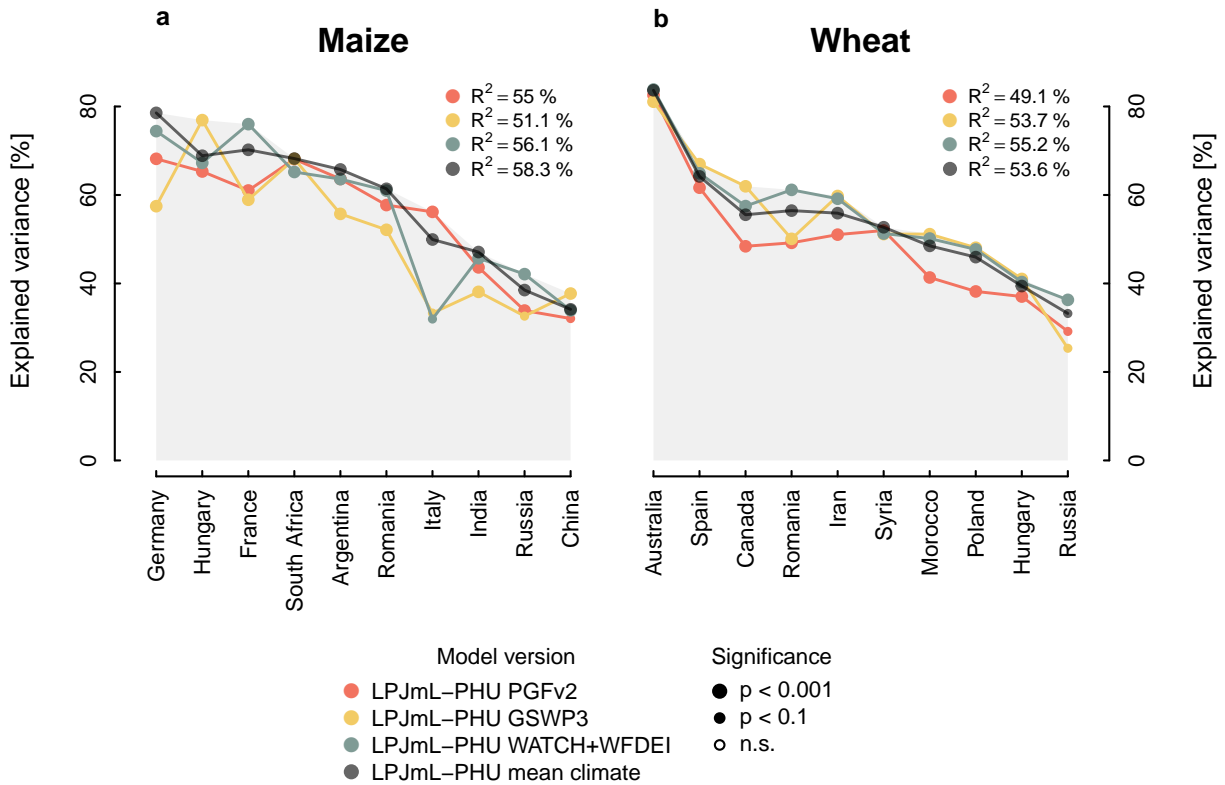

**Fig. S6. Evaluation of different climate inputs.** The figure shows the explained variance of country-level yield anomalies, similar to Figure 1, but for LPJmL-PHU simulations based on three climate inputs (PGFv2.1, GSWP3, and WATCH+WFDEI), for maize (a) and wheat (b), respectively. The simulation "mean climate" refers to the mean of individual LPJmL-PHU simulations forced by the respective climate input.  $R^2$  values in the top-right corner indicate the mean value across displayed countries.

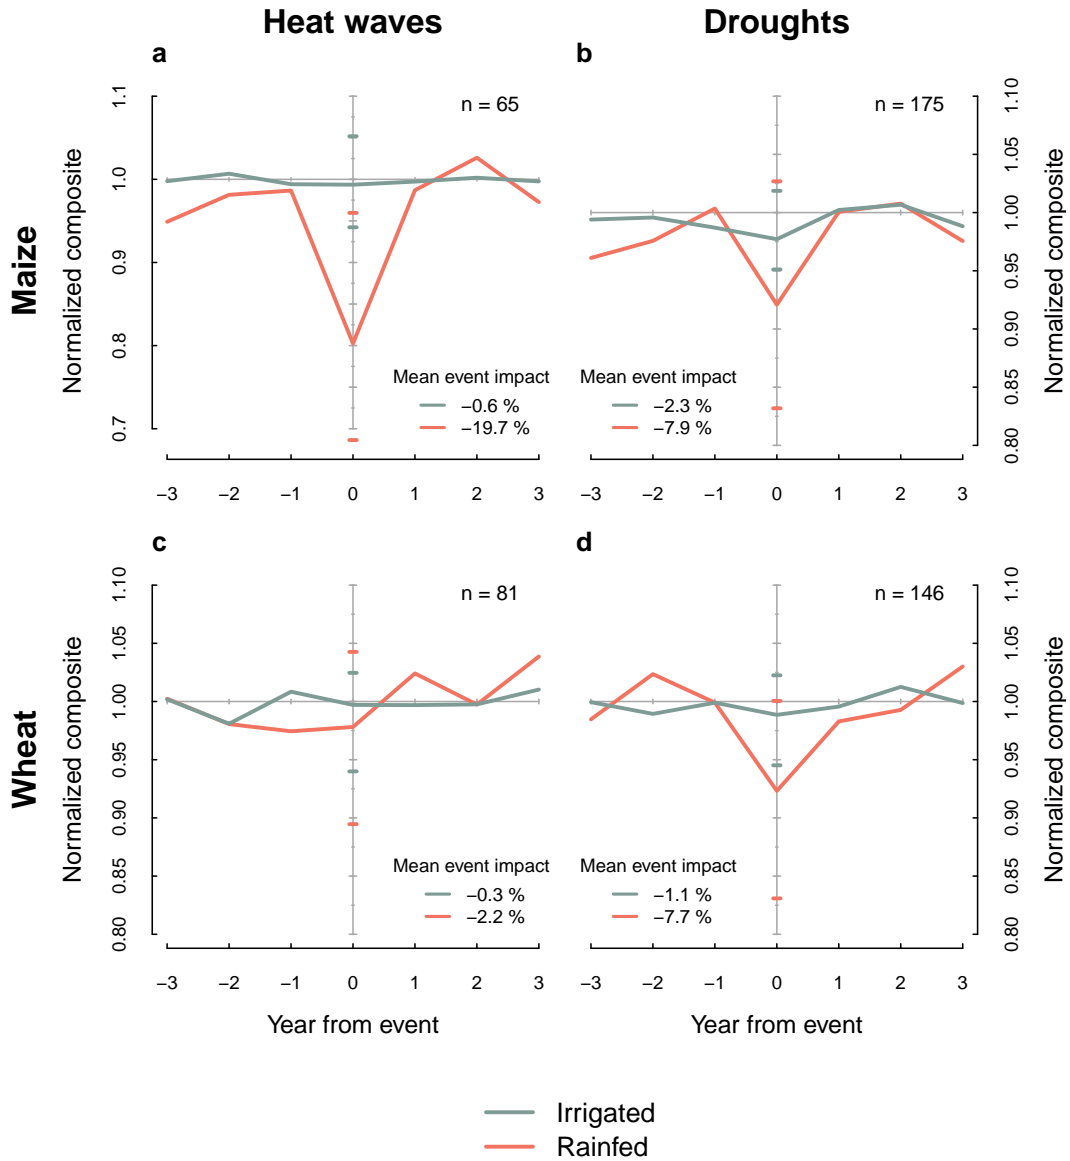

**Fig. S7. Influences of heat waves and droughts on rainfed and irrigated yields.** Similar to Figure 2, but separated for rainfed and irrigated systems, this composite plot illustrates average yield influences (maize top row, wheat bottom row) of worldwide heat waves (first column) and droughts (second column) recorded in EM-DAT (13) (1964 – 2007), simulated with the LPJmL-PHU model. Note the different y-axis scale in panel a.



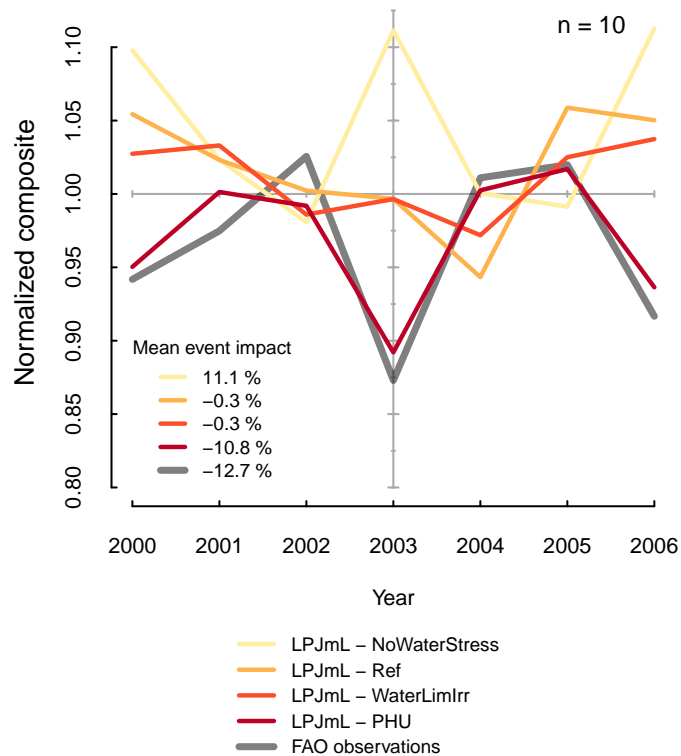

**Fig. S8. Observed and simulated influences of the 2003 European heat wave on maize yields.** Similar to Figure 2a, this plot shows a composite of maize yield impacts induced by heat waves, but here for countries affected by the European heat wave in 2003 only (10 countries listed in EM-DAT (13): Austria, Belgium, Croatia, France, Germany, Italy, Netherlands, Portugal, Slovakia, Spain).

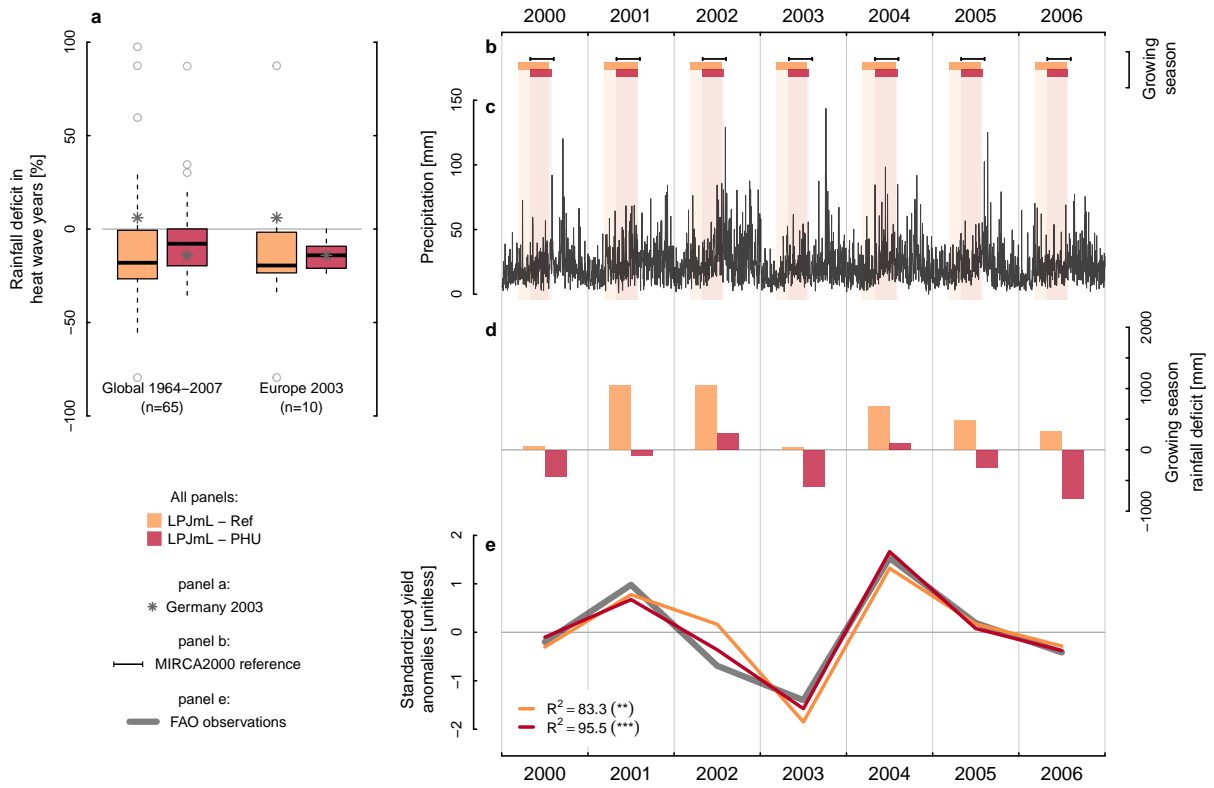

**Fig. S9. Effects of growing season adjustment on wheat rainfall deficit.** Same as Figure 3 but for spring wheat.

**Table S1. Explained variances and RMSE of maize country-level yield anomalies.** This table details data for Figure 1 and S1. Simulated yield anomalies are evaluated at country level aggregation against FAO statistics for the four simulations LPJmL–NoWaterStress, LPJmL–Ref, LPJmL–WaterLimIrr, and LPJmL–PHU (details in Table 1), based on the coefficient of determination ( $R^2$ , in percent) and Root Mean Square Error (RMSE, unitless). The table lists the main producer countries (accounting for 90% of global maize production, as of the 2000 – 2011 mean) and is ordered by best  $R^2$  performance across LPJmL–Ref, LPJmL–WaterLimIrr, and LPJmL–PHU (separating the most weather-sensitive main producers, in accordance with Fig. 1 and S1). Statistical significance of the explained variance is indicated through (\*) if p-value < 0.1 and (n.s.) otherwise.

|                                                      | Country       | LPJmL–NoWaterStress |                    | LPJmL–Ref    |                    | LPJmL–WaterLimIrr |                    | LPJmL–PHU    |                    |
|------------------------------------------------------|---------------|---------------------|--------------------|--------------|--------------------|-------------------|--------------------|--------------|--------------------|
|                                                      |               | $R^2$<br>[%]        | RMSE<br>[unitless] | $R^2$<br>[%] | RMSE<br>[unitless] | $R^2$<br>[%]      | RMSE<br>[unitless] | $R^2$<br>[%] | RMSE<br>[unitless] |
| 1                                                    | Germany       | 8.5 (n.s.)          | 1.54               | 11.5 (*)     | 1.11               | 16.8 (*)          | 1.04               | 78.6 (*)     | 0.46               |
| 2                                                    | France        | 7.5 (n.s.)          | 1.55               | 38.8 (*)     | 0.86               | 33.5 (*)          | 0.9                | 70.2 (*)     | 0.57               |
| 3                                                    | Hungary       | 6.3 (n.s.)          | 1.52               | 34.8 (*)     | 0.89               | 35 (*)            | 0.89               | 68.9 (*)     | 0.58               |
| 4                                                    | South Africa  | 10.6 (*)            | 1.53               | 40 (*)       | 0.85               | 47.1 (*)          | 0.78               | 68.2 (*)     | 0.59               |
| 5                                                    | Argentina     | 1.4 (n.s.)          | 1.45               | 60.4 (*)     | 0.65               | 57.7 (*)          | 0.68               | 65.8 (*)     | 0.6                |
| 6                                                    | Romania       | 15.8 (*)            | 1.59               | 39.3 (*)     | 0.86               | 45.5 (*)          | 0.8                | 61.4 (*)     | 0.66               |
| 7                                                    | Italy         | 2.8 (n.s.)          | 1.24               | 11.6 (*)     | 1.12               | 29.2 (*)          | 0.93               | 49.9 (*)     | 0.74               |
| 8                                                    | India         | 11.5 (*)            | 1.05               | 18.5 (*)     | 1.01               | 34.9 (*)          | 0.88               | 47.1 (*)     | 0.78               |
| 9                                                    | Russia        | 3 (n.s.)            | 1.49               | 3 (n.s.)     | 1.25               | 17 (*)            | 1.04               | 38.5 (*)     | 0.83               |
| 10                                                   | United States | 31 (*)              | 0.9                | 31.9 (*)     | 0.92               | 28.2 (*)          | 0.96               | 35.7 (*)     | 0.89               |
| 11                                                   | China         | 0.7 (n.s.)          | 1.41               | 31.1 (*)     | 0.94               | 31.8 (*)          | 0.94               | 34.2 (*)     | 0.92               |
| 12                                                   | Brazil        | 3 (n.s.)            | 1.28               | 23.6 (*)     | 1                  | 29.2 (*)          | 0.94               | 33.7 (*)     | 0.81               |
| 13                                                   | Thailand      | 1.6 (n.s.)          | 1.22               | 27.3 (*)     | 0.94               | 28 (*)            | 0.94               | 25.3 (*)     | 0.96               |
| 14                                                   | Spain         | 3.2 (n.s.)          | 1.24               | 8 (n.s.)     | 1.14               | 17.3 (*)          | 1.07               | 22.8 (*)     | 1.02               |
| 15                                                   | Nigeria       | 2.7 (n.s.)          | 1.46               | 2.1 (n.s.)   | 1.42               | 0 (n.s.)          | 1.33               | 16.4 (*)     | 1.4                |
| 16                                                   | Canada        | 10.9 (*)            | 1.1                | 4.6 (n.s.)   | 1.2                | 1.5 (n.s.)        | 1.3                | 12.1 (*)     | 1.01               |
| 17                                                   | Ukraine       | 0.6 (n.s.)          | 1.37               | 6.2 (n.s.)   | 1.22               | 7.2 (n.s.)        | 1.21               | 0.2 (n.s.)   | 1.16               |
| 18                                                   | Philippines   | 0.1 (n.s.)          | 1.35               | 4.6 (n.s.)   | 1.21               | 5.5 (n.s.)        | 1.2                | 1 (n.s.)     | 1.04               |
| 19                                                   | Indonesia     | 3.5 (n.s.)          | 1.09               | 0.7 (n.s.)   | 1.21               | 0.3 (n.s.)        | 1.24               | 5 (n.s.)     | 1.2                |
| 20                                                   | Mexico        | 2.8 (n.s.)          | 1.5                | 0 (n.s.)     | 1.38               | 1.9 (n.s.)        | 1.29               | 2.7 (n.s.)   | 1.27               |
| mean of most weather-sensitive main producers (1–10) |               | 9.84                | 1.39               | 28.98        | 0.95               | 34.49             | 0.89               | 58.43        | 0.67               |
| mean of all main producers (1–20)                    |               | 6.38                | 1.34               | 19.9         | 1.06               | 23.38             | 1.02               | 36.88        | 0.87               |

**Table S2. Explained variances and RMSE of wheat country-level yield anomalies.** Same as Table S1, but for wheat.

|    | Country                                                 | LPJmL–NoWaterStress |                      | LPJmL–Ref    |                      | LPJmL–WaterLimIrr |                      | LPJmL–PHU    |                      |
|----|---------------------------------------------------------|---------------------|----------------------|--------------|----------------------|-------------------|----------------------|--------------|----------------------|
|    |                                                         | $R^2$<br>[%]        | $RMSE$<br>[unitless] | $R^2$<br>[%] | $RMSE$<br>[unitless] | $R^2$<br>[%]      | $RMSE$<br>[unitless] | $R^2$<br>[%] | $RMSE$<br>[unitless] |
| 1  | Australia                                               | 7.6 (n.s.)          | 1.57                 | 67.2 (*)     | 0.6                  | 75.5 (*)          | 0.5                  | 83.7 (*)     | 0.41                 |
| 2  | Spain                                                   | 0.7 (n.s.)          | 1.37                 | 63 (*)       | 0.64                 | 65.7 (*)          | 0.62                 | 64.2 (*)     | 0.63                 |
| 3  | Syria                                                   | 7.5 (n.s.)          | 1.13                 | 63.4 (*)     | 0.63                 | 57.8 (*)          | 0.69                 | 52.7 (*)     | 0.74                 |
| 4  | Romania                                                 | 18.9 (*)            | 1.04                 | 56.2 (*)     | 0.71                 | 51.5 (*)          | 0.75                 | 56.5 (*)     | 0.71                 |
| 5  | Iran                                                    | 0.1 (n.s.)          | 1.34                 | 44.8 (*)     | 0.8                  | 48.9 (*)          | 0.76                 | 55.9 (*)     | 0.7                  |
| 6  | Canada                                                  | 15.7 (*)            | 1.09                 | 30.4 (*)     | 0.92                 | 51.6 (*)          | 0.73                 | 55.5 (*)     | 0.69                 |
| 7  | Morocco                                                 | 0.5 (n.s.)          | 1.34                 | 30.6 (*)     | 0.94                 | 43.1 (*)          | 0.82                 | 48.5 (*)     | 0.78                 |
| 8  | Poland                                                  | 0.1 (n.s.)          | 1.38                 | 28.6 (*)     | 0.93                 | 9.2 (n.s.)        | 1.12                 | 46 (*)       | 0.78                 |
| 9  | Hungary                                                 | 35.5 (*)            | 0.87                 | 41.8 (*)     | 0.84                 | 39 (*)            | 0.86                 | 39.4 (*)     | 0.86                 |
| 10 | Turkey                                                  | 0.3 (n.s.)          | 1.3                  | 25 (*)       | 0.99                 | 27.3 (*)          | 0.97                 | 35.3 (*)     | 0.91                 |
| 11 | Russia                                                  | 27.2 (*)            | 0.96                 | 34.1 (*)     | 0.89                 | 19.4 (*)          | 1.02                 | 33.2 (*)     | 0.9                  |
| 12 | China                                                   | 0.4 (n.s.)          | 1.28                 | 7.7 (n.s.)   | 1.16                 | 11.9 (*)          | 1.11                 | 33.1 (*)     | 0.87                 |
| 13 | Czech Republic                                          | 9.2 (n.s.)          | 1.14                 | 31.1 (*)     | 0.94                 | 28.3 (*)          | 0.96                 | 30 (*)       | 0.95                 |
| 14 | Germany                                                 | 5.3 (n.s.)          | 1.21                 | 21.6 (*)     | 1.04                 | 12.4 (*)          | 1.12                 | 30.5 (*)     | 0.93                 |
| 15 | United Kingdom                                          | 2.6 (n.s.)          | 1.27                 | 13.8 (*)     | 1.63                 | 0.6 (n.s.)        | 1.33                 | 29.6 (*)     | 0.94                 |
| 16 | Ukraine                                                 | 15.6 (*)            | 1.07                 | 25.5 (*)     | 1                    | 26 (*)            | 0.99                 | 27.5 (*)     | 0.98                 |
| 17 | United States                                           | 52.7 (*)            | 0.72                 | 22.6 (*)     | 1.01                 | 22.9 (*)          | 1.01                 | 26.7 (*)     | 0.98                 |
| 18 | France                                                  | 4.4 (n.s.)          | 1.24                 | 22.9 (*)     | 1                    | 17.8 (*)          | 1.05                 | 22.1 (*)     | 1.01                 |
| 19 | Byelarus                                                | 9.5 (n.s.)          | 1.13                 | 7.1 (n.s.)   | 1.17                 | 10.8 (*)          | 1.14                 | 22.4 (*)     | 1                    |
| 20 | Pakistan                                                | 7.8 (n.s.)          | 1.18                 | 8.3 (n.s.)   | 1.17                 | 6.6 (n.s.)        | 1.2                  | 19.9 (*)     | 1.68                 |
| 21 | Argentina                                               | 4.3 (n.s.)          | 1.37                 | 0.8 (n.s.)   | 1.21                 | 4.7 (n.s.)        | 1.16                 | 16.4 (*)     | 0.99                 |
| 22 | Italy                                                   | 6 (n.s.)            | 1.19                 | 12.2 (*)     | 1.11                 | 12.6 (*)          | 1.1                  | 15.1 (*)     | 1.09                 |
| 23 | India                                                   | 2.8 (n.s.)          | 1.25                 | 1.5 (n.s.)   | 1.3                  | 0 (n.s.)          | 1.4                  | 10.6 (*)     | 1.6                  |
| 24 | Denmark                                                 | 0.1 (n.s.)          | 1.37                 | 0 (n.s.)     | 1.36                 | 0 (n.s.)          | 1.37                 | 9.4 (n.s.)   | 1.14                 |
| 25 | Kazakhstan                                              | 0.2 (n.s.)          | 1.35                 | 1.5 (n.s.)   | 1.3                  | 1.6 (n.s.)        | 1.3                  | 6.9 (n.s.)   | 1.16                 |
| 26 | Mexico                                                  | 2.4 (n.s.)          | 1.27                 | 0 (n.s.)     | 1.37                 | 0.1 (n.s.)        | 1.4                  | 1.3 (n.s.)   | 1.13                 |
|    | mean of most weather-sensitive<br>main producers (1–10) | 8.69                | 1.24                 | 45.1         | 0.8                  | 46.96             | 0.78                 | 53.77        | 0.72                 |
|    | mean of all<br>main producers (1–26)                    | 9.13                | 1.21                 | 25.45        | 1.03                 | 24.82             | 1.02                 | 33.55        | 0.94                 |

**Table S3. List of extreme events considered in this study.** Heat wave and drought events between 1964 – 2007 recorded at country level in EM-DAT (13) are included in the analysis of maize and wheat simulations (Figure 2) if the respective crop contributes at least 5% to the total country cropland area. Country names are shown as ISO3 codes.

| Maize                |          |                     |          | Wheat                |          |                     |          |          |          |
|----------------------|----------|---------------------|----------|----------------------|----------|---------------------|----------|----------|----------|
| Heat waves<br>(n=65) |          | Droughts<br>(n=175) |          | Heat waves<br>(n=81) |          | Droughts<br>(n=146) |          |          |          |
| 1                    | 1966 USA | 1964 ECU            | 1985 CHN | 1999 USA             | 1965 IND | 2005 IND            | 1964 IND | 1989 FRA | 2003 HUN |
| 2                    | 1968 MEX | 1964 NPL            | 1986 HUN | 1999 URY             | 1966 USA | 2005 PAK            | 1964 IRN | 1990 BOL | 2003 RUS |
| 3                    | 1972 ARG | 1964 SOM            | 1986 IDN | 2000 BOL             | 1968 MEX | 2005 PRT            | 1964 NPL | 1990 GRC | 2004 BOL |
| 4                    | 1972 USA | 1964 ZAF            | 1986 ZAF | 2000 BIH             | 1972 ARG | 2005 USA            | 1964 ZAF | 1990 PER | 2004 PER |
| 5                    | 1980 USA | 1965 CHN            | 1987 ETH | 2000 BGR             | 1972 USA | 2006 FRA            | 1965 CHN | 1990 ESP | 2004 PRT |
| 6                    | 1983 PER | 1965 ETH            | 1987 SOM | 2000 GEO             | 1975 PAK | 2006 ESP            | 1965 ETH | 1990 MKD | 2004 ZAF |
| 7                    | 1983 USA | 1965 KEN            | 1987 VNM | 2000 MDA             | 1978 IND | 2007 ALB            | 1966 MAR | 1991 AUS | 2005 CHN |
| 8                    | 1985 GRC | 1966 BFA            | 1988 BOL | 2000 ROU             | 1979 PAK | 2007 AUT            | 1966 PER | 1991 CHL | 2005 ZMB |
| 9                    | 1986 USA | 1966 IDN            | 1988 BFA | 2000 SOM             | 1980 USA | 2007 BGR            | 1967 AUS | 1991 CHN | 2006 AFG |
| 10                   | 1987 GRC | 1966 PER            | 1988 CAN | 2001 BFA             | 1983 PER | 2007 GRC            | 1967 NPL | 1991 FRA | 2006 AUS |
| 11                   | 1987 NPL | 1966 SEN            | 1988 CHN | 2001 CMR             | 1983 USA | 2007 HUN            | 1968 CHL | 1991 ZAF | 2006 NPL |
| 12                   | 1988 MKD | 1967 NPL            | 1988 MEX | 2001 NAM             | 1985 GRC | 2007 ITA            | 1968 LSO | 1991 USA | 2006 PER |
| 13                   | 1990 FRA | 1967 TZA            | 1988 ZAF | 2001 SWZ             | 1985 IND | 2007 JPN            | 1969 AFG | 1991 ZMB | 2007 LSO |
| 14                   | 1990 MEX | 1968 HTI            | 1988 TZA | 2001 ZWE             | 1986 USA | 2007 MKD            | 1969 ETH | 1991 ZWE | 2007 MDA |
| 15                   | 1990 USA | 1969 BFA            | 1988 USA | 2002 ITA             | 1987 GRC | 2007 SVK            | 1969 IRQ | 1992 DNK | 2007 USA |
| 16                   | 1993 USA | 1969 ETH            | 1989 ALB | 2002 MEX             | 1987 IND | 2007 TUR            | 1969 PER | 1992 HUN | 2007 ZWE |
| 17                   | 1994 CHN | 1969 PER            | 1989 ETH | 2002 PER             | 1987 NPL |                     | 1969 YMN | 1992 LSO |          |
| 18                   | 1994 ROU | 1969 SEN            | 1989 FRA | 2002 SEN             | 1988 MKD |                     | 1971 AFG | 1992 PER |          |
| 19                   | 1995 RUS | 1969 SOM            | 1990 BOL | 2002 VNM             | 1990 FRA |                     | 1971 MAR | 1993 IND |          |
| 20                   | 1995 ESP | 1969 YMN            | 1990 BFA | 2003 ARG             | 1990 MEX |                     | 1972 IND | 1993 MKD |          |
| 21                   | 1995 USA | 1971 CMR            | 1990 CMR | 2003 BIH             | 1990 USA |                     | 1972 NPL | 1993 RUS |          |
| 22                   | 1996 ROU | 1971 KEN            | 1990 GRC | 2003 HRV             | 1991 PAK |                     | 1973 ETH | 1994 BOL |          |
| 23                   | 1997 CHN | 1972 IDN            | 1990 PER | 2003 ETH             | 1993 AUS |                     | 1974 AUS | 1995 MEX |          |
| 24                   | 1998 ITA | 1972 NPL            | 1990 ESP | 2003 HTI             | 1993 USA |                     | 1977 BOL | 1995 ZAF |          |
| 25                   | 1998 ROU | 1973 ETH            | 1990 SWZ | 2003 HUN             | 1994 CHN |                     | 1977 CAN | 1995 ZMB |          |
| 26                   | 1998 USA | 1974 HTI            | 1990 MKD | 2003 IDN             | 1994 IND |                     | 1977 JPN | 1996 IND |          |
| 27                   | 2000 BGR | 1974 SOM            | 1991 CHN | 2003 RUS             | 1994 ROU |                     | 1977 TUN | 1997 CHN |          |
| 28                   | 2000 HRV | 1976 BEL            | 1991 FRA | 2003 TZA             | 1995 EGY |                     | 1977 YMN | 1997 ETH |          |
| 29                   | 2000 GRC | 1977 BOL            | 1991 KEN | 2004 BOL             | 1995 RUS |                     | 1978 AUS | 1997 FRA |          |
| 30                   | 2000 ROU | 1977 BFA            | 1991 NAM | 2004 KEN             | 1995 ESP |                     | 1978 CHN | 1997 ITA |          |
| 31                   | 2001 NZL | 1977 CAN            | 1991 ZAF | 2004 PER             | 1995 USA |                     | 1978 MEX | 1997 PRT |          |
| 32                   | 2001 RUS | 1977 HTI            | 1991 TZA | 2004 PRT             | 1996 PAK |                     | 1979 IND | 1998 IRQ |          |
| 33                   | 2002 CHN | 1977 SEN            | 1991 USA | 2004 SOM             | 1996 ROU |                     | 1979 NPL | 1998 RUS |          |
| 34                   | 2002 NGA | 1977 TZA            | 1991 ZMB | 2004 ZAF             | 1997 CHN |                     | 1980 ZAF | 1998 ZWE |          |
| 35                   | 2003 AUT | 1977 YMN            | 1991 ZWE | 2005 CMR             | 1998 IND |                     | 1980 ESP | 1999 CHN |          |
| 36                   | 2003 BEL | 1978 CHN            | 1992 HTI | 2005 CHN             | 1998 ITA |                     | 1981 DZA | 1999 IRN |          |
| 37                   | 2003 HRV | 1978 IDN            | 1992 HUN | 2005 VNM             | 1998 ROU |                     | 1981 AUS | 1999 ISR |          |
| 38                   | 2003 FRA | 1978 MEX            | 1992 PER | 2005 ZMB             | 1998 USA |                     | 1982 FRA | 1999 JOR |          |
| 39                   | 2003 DEU | 1979 KEN            | 1993 MKD | 2006 NPL             | 1999 PAK |                     | 1982 IND | 1999 MEX |          |
| 40                   | 2003 ITA | 1979 NPL            | 1993 RUS | 2006 PER             | 2000 BGR |                     | 1982 ZAF | 1999 MAR |          |
| 41                   | 2003 NLD | 1980 BFA            | 1994 BOL | 2006 TZA             | 2000 HRV |                     | 1982 ZMB | 1999 PAK |          |
| 42                   | 2003 PRT | 1980 HTI            | 1994 KEN | 2007 MDA             | 2000 GRC |                     | 1982 ZWE | 1999 ESP |          |
| 43                   | 2003 SVK | 1980 SOM            | 1994 NZL | 2007 SWZ             | 2000 ISR |                     | 1983 BOL | 1999 SYR |          |
| 44                   | 2003 ESP | 1980 ZAF            | 1995 BFA | 2007 USA             | 2000 JOR |                     | 1983 BGR | 1999 USA |          |
| 45                   | 2004 ALB | 1980 ESP            | 1995 MEX | 2007 ZWE             | 2000 MAR |                     | 1983 ETH | 2000 AFG |          |
| 46                   | 2004 CHN | 1982 FRA            | 1995 NAM |                      | 2000 ROU |                     | 1983 LSO | 2000 ARM |          |
| 47                   | 2004 MKD | 1982 IDN            | 1995 ZAF |                      | 2000 TUR |                     | 1983 MAR | 2000 AZE |          |
| 48                   | 2004 ROU | 1982 NAM            | 1995 ZMB |                      | 2001 RUS |                     | 1983 PER | 2000 BOL |          |
| 49                   | 2005 PRT | 1982 SEN            | 1996 TZA |                      | 2002 CHN |                     | 1983 PRT | 2000 BGR |          |
| 50                   | 2005 USA | 1982 ZAF            | 1997 CHN |                      | 2002 IND |                     | 1983 ROU | 2000 GEO |          |
| 51                   | 2006 BEL | 1982 ZMB            | 1997 ECU |                      | 2002 PAK |                     | 1984 CAN | 2000 IND |          |
| 52                   | 2006 FRA | 1982 ZWE            | 1997 ETH |                      | 2003 DZA |                     | 1985 CHN | 2000 MDA |          |
| 53                   | 2006 DEU | 1983 BOL            | 1997 FRA |                      | 2003 AUT |                     | 1986 HUN | 2000 MNG |          |
| 54                   | 2006 NLD | 1983 BGR            | 1997 IDN |                      | 2003 HRV |                     | 1986 ZAF | 2000 ROU |          |
| 55                   | 2006 ESP | 1983 ETH            | 1997 ITA |                      | 2003 FRA |                     | 1987 ETH | 2000 TJK |          |
| 56                   | 2007 ALB | 1983 NGA            | 1997 KEN |                      | 2003 ITA |                     | 1987 IND | 2000 UZB |          |
| 57                   | 2007 AUT | 1983 PER            | 1997 PRT |                      | 2003 PRT |                     | 1988 BOL | 2001 ZWE |          |
| 58                   | 2007 BIH | 1983 PRT            | 1997 VNM |                      | 2003 SVK |                     | 1988 CAN | 2002 AUS |          |
| 59                   | 2007 BGR | 1983 ROU            | 1998 BFA |                      | 2003 ESP |                     | 1988 CHN | 2002 ITA |          |
| 60                   | 2007 GRC | 1983 SOM            | 1998 NAM |                      | 2003 GBR |                     | 1988 MEX | 2002 LSO |          |
| 61                   | 2007 HUN | 1983 SWZ            | 1998 RUS |                      | 2004 ALB |                     | 1988 ZAF | 2002 MEX |          |
| 62                   | 2007 ITA | 1984 CAN            | 1998 ZWE |                      | 2004 CHN |                     | 1988 TUN | 2002 PER |          |
| 63                   | 2007 MKD | 1984 IDN            | 1999 CHN |                      | 2004 JPN |                     | 1988 USA | 2003 ARG |          |
| 64                   | 2007 SRB | 1984 KEN            | 1999 MEX |                      | 2004 MKD |                     | 1989 ALB | 2003 HRV |          |
| 65                   | 2007 SVK | 1984 TZA            | 1999 ESP |                      | 2004 ROU |                     | 1989 ETH | 2003 ETH |          |
